# Supplementary material for: Visible light photocatalytic water oxidation over complex perovskites Sr3BNb2O9 (B = Mg, Ca and Sr) doped with nitrogen
Source: Royal Society of Chemistry journal article supplement (doi:10.1039/c9qi01151j), 2019-01-01
Supplement: c9qi01151j1.pdf [file c9qi01151j1.pdf]

## Supplementary Information

### Visible light photocatalytic water oxidation over complex perovskite $\text{Sr}_3\text{BNb}_2\text{O}_9$ (B = Mg, Ca and Sr) doped with nitrogen

Ran Wang<sup>a</sup>, Guoan Lin<sup>a</sup> and Xiaoxiang Xu<sup>\*a,b</sup>

*<sup>a</sup>Shanghai Key Lab of Chemical Assessment and Sustainability, School of Chemical Science and Engineering, Tongji University, 1239 Siping Road, Shanghai, 200092, China, Email: [xxxu@tongji.edu.cn](mailto:xxxu@tongji.edu.cn), telephone: +86-21-65986919*

*<sup>b</sup>Clinical and Central Lab, Putuo People's Hospital, Tongji University, 1291 Jiangning Road, Shanghai, 200060, China*

\*Corresponding author

#### Table of content

Figure S1. Thermogravimetric analysis (TGA) curves of  $\text{Sr}_3\text{BNb}_2\text{O}_{9-x}\text{N}_y$  (B = Mg, Ca and Sr) powders in air with heating rate of  $10 \text{ K min}^{-1}$  from  $30 \text{ }^\circ\text{C}$  to  $1000 \text{ }^\circ\text{C}$ .

Figure S2. FT-IR spectra of  $\text{Sr}_3\text{BNb}_2\text{O}_{9-x}\text{N}_y$  (B = Mg, Ca and Sr) powders.

Figure S3. Transmission electron microscopic (TEM) images of  $\text{Sr}_3\text{BNb}_2\text{O}_{9-x}\text{N}_y$  (B =

Mg, Ca and Sr) powders: (a)  $\text{Sr}_3\text{MgNb}_2\text{O}_{9-x}\text{N}_y$ , (b)  $\text{Sr}_3\text{CaNb}_2\text{O}_{9-x}\text{N}_y$  and (c)  $\text{Sr}_3\text{SrNb}_2\text{O}_{9-x}\text{N}_y$ .

Figure S4. Repeated cycles of photocatalytic oxygen evolution for  $\text{Sr}_3\text{SrNb}_2\text{O}_{9-x}\text{N}_y$  loaded with 1 wt%  $\text{Rh}_2\text{O}_3$  under visible light illumination ( $\lambda \geq 400$  nm), sodium persulfate (0.05 M) was used as a sacrificial agent. Evacuation was performed every 2.5 hours.

Figure S5. XRD patterns of  $\text{Sr}_3\text{SrNb}_2\text{O}_{9-x}\text{N}_y$  before and after photocatalytic experiment.

Figure S6. High resolution TEM image of  $\text{Sr}_3\text{SrNb}_2\text{O}_{9-x}\text{N}_y$  loaded with 1 wt%  $\text{Rh}_2\text{O}_3$ , lattice fringe marked corresponds to (110) planes of  $\text{Rh}_2\text{O}_3$ .

Table S1 Effective chemical formula of  $\text{Sr}_3\text{BNb}_2\text{O}_{9-x}\text{N}_y$  (B = Mg, Ca and Sr) determined by thermogravimetric analysis (TGA)

Table S2 Cation percentage of  $\text{Sr}_3\text{BNb}_2\text{O}_{9-x}\text{N}_y$  (B = Mg, Ca and Sr) determined by energy dispersive X-ray spectroscopy (EDS), standard deviation is included in the parenthesis.

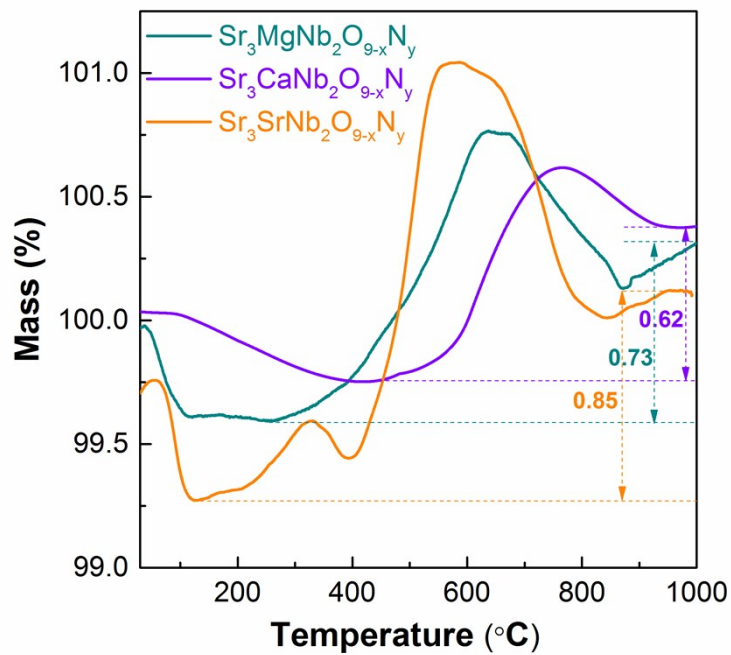

Figure S1. Thermogravimetric analysis (TGA) curves of  $\text{Sr}_3\text{BNb}_2\text{O}_{9-x}\text{N}_y$  (B = Mg, Ca and Sr) powders in air with heating rate of  $10 \text{ K min}^{-1}$  from  $30 \text{ }^\circ\text{C}$  to  $1000 \text{ }^\circ\text{C}$ .

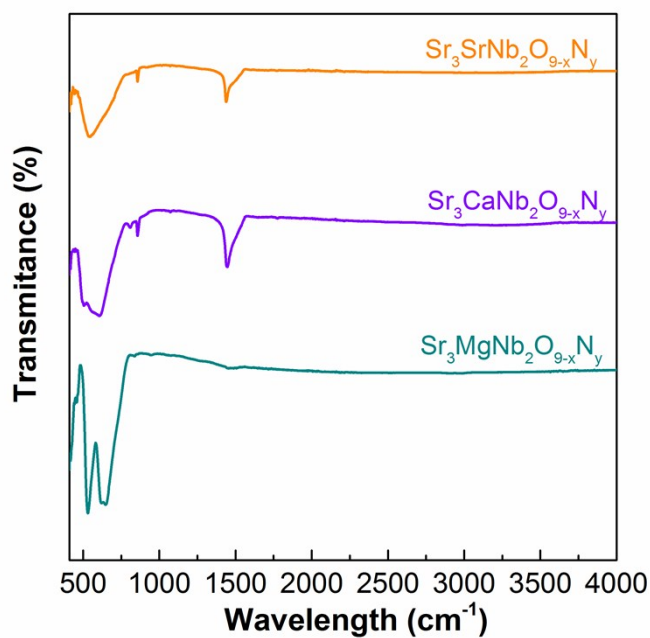

Figure S2. FT-IR spectra of  $\text{Sr}_3\text{BNb}_2\text{O}_{9-x}\text{N}_y$  (B = Mg, Ca and Sr) powders.

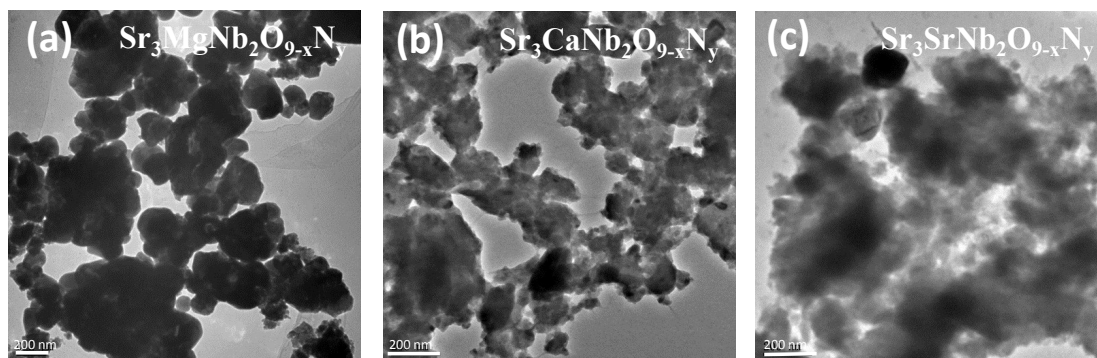

Figure S3. Transmission electron microscopic (TEM) images of  $\text{Sr}_3\text{BNb}_2\text{O}_{9-x}\text{N}_y$  (B = Mg, Ca and Sr) powders: (a)  $\text{Sr}_3\text{MgNb}_2\text{O}_{9-x}\text{N}_y$ , (b)  $\text{Sr}_3\text{CaNb}_2\text{O}_{9-x}\text{N}_y$  and (c)  $\text{Sr}_3\text{SrNb}_2\text{O}_{9-x}\text{N}_y$ .

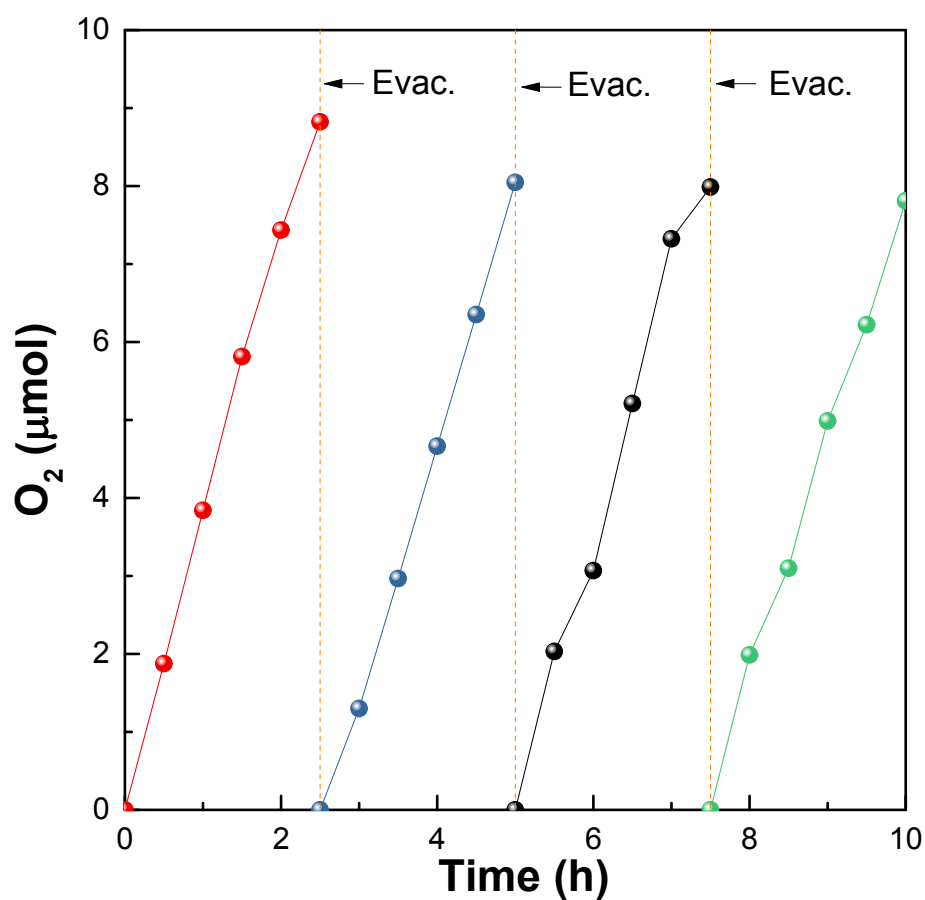

Figure S4. Repeated cycles of photocatalytic oxygen evolution for  $\text{Sr}_3\text{SrNb}_2\text{O}_{9-x}\text{N}_y$

loaded with 1 wt% Rh<sub>2</sub>O<sub>3</sub> under visible light illumination ( $\lambda \geq 400$  nm), sodium persulfate (0.05 M) was used as a sacrificial agent. Evacuation was performed every 2.5 hours.

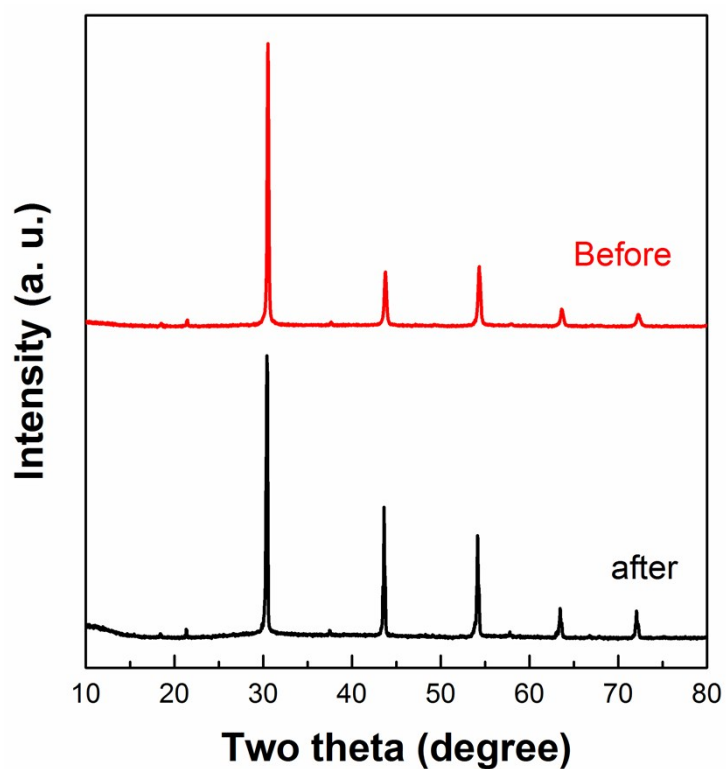

Figure S5. XRD patterns of Sr<sub>3</sub>SrNb<sub>2</sub>O<sub>9-x</sub>N<sub>y</sub> before and after photocatalytic experiment.

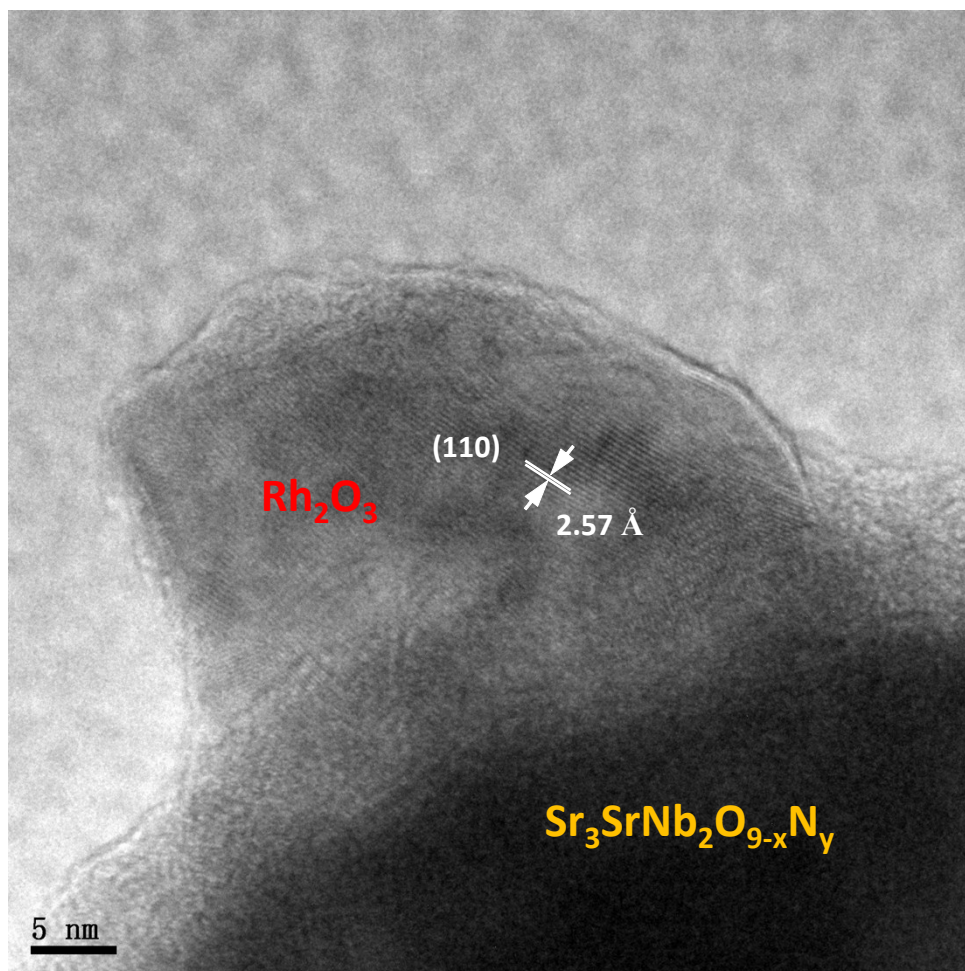

Figure S6. High resolution TEM image of  $\text{Sr}_3\text{SrNb}_2\text{O}_{9-x}\text{N}_y$  loaded with 1 wt%  $\text{Rh}_2\text{O}_3$ , lattice fringe marked corresponds to (110) planes of  $\text{Rh}_2\text{O}_3$ .

Table S1 Effective chemical formula of  $\text{Sr}_3\text{BNb}_2\text{O}_{9-x}\text{N}_y$  (B = Mg, Ca and Sr) determined by thermogravimetric analysis (TGA)

| Compound                                           | Effective chemical formula                                 |
|----------------------------------------------------|------------------------------------------------------------|
| $\text{Sr}_3\text{MgNb}_2\text{O}_{9-x}\text{N}_y$ | $\text{Sr}_3\text{MgNb}_2\text{O}_{8.927}\text{N}_{0.049}$ |
| $\text{Sr}_3\text{CaNb}_2\text{O}_{9-x}\text{N}_y$ | $\text{Sr}_3\text{CaNb}_2\text{O}_{8.912}\text{N}_{0.059}$ |
| $\text{Sr}_3\text{SrNb}_2\text{O}_{9-x}\text{N}_y$ | $\text{Sr}_3\text{SrNb}_2\text{O}_{8.891}\text{N}_{0.073}$ |

Table S2 Cation percentage of  $\text{Sr}_3\text{BNb}_2\text{O}_{9-x}\text{N}_y$  (B = Mg, Ca and Sr) determined by energy dispersive X-ray spectroscopy (EDS), standard deviation is included in the parenthesis.

|                                                    | Mg (at. %) | Ca (at. %) | Sr (at. %) | Nb (at. %) |
|----------------------------------------------------|------------|------------|------------|------------|
| $\text{Sr}_3\text{MgNb}_2\text{O}_{9-x}\text{N}_y$ | 16(1)      | —          | 49(1)      | 35(1)      |
| $\text{Sr}_3\text{CaNb}_2\text{O}_{9-x}\text{N}_y$ | —          | 16(1)      | 50(1)      | 34(1)      |
| $\text{Sr}_3\text{SrNb}_2\text{O}_{9-x}\text{N}_y$ | —          | —          | 67(1)      | 33(1)      |
